# Supplementary material
Source: Springer Nature journal article supplement (https://www.springermedizin.de/resource/supplementary/12963_2011_151_MOESM7_ESM.pdf/9572764)

a)

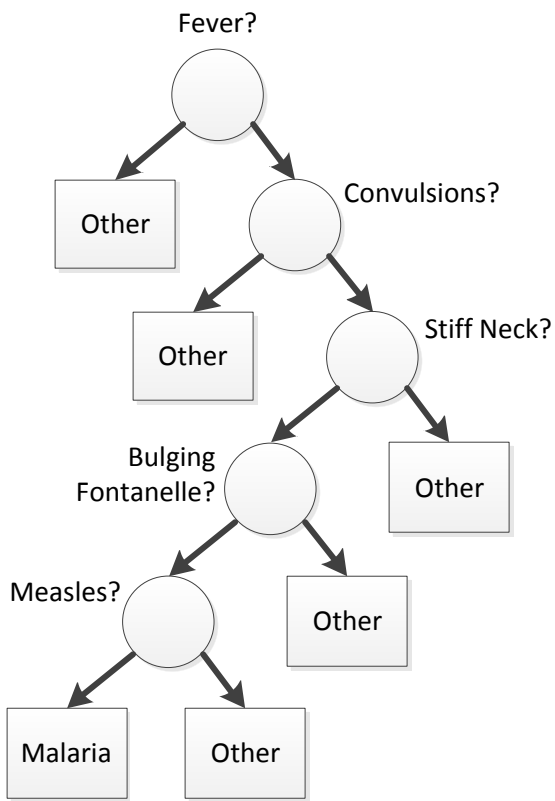

b)

Excessive bleeding after delivery or abortion?

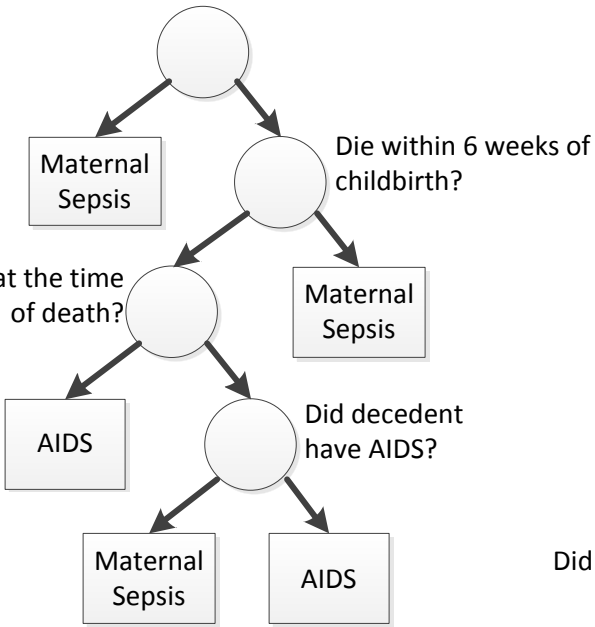

Did decedent have AIDS?

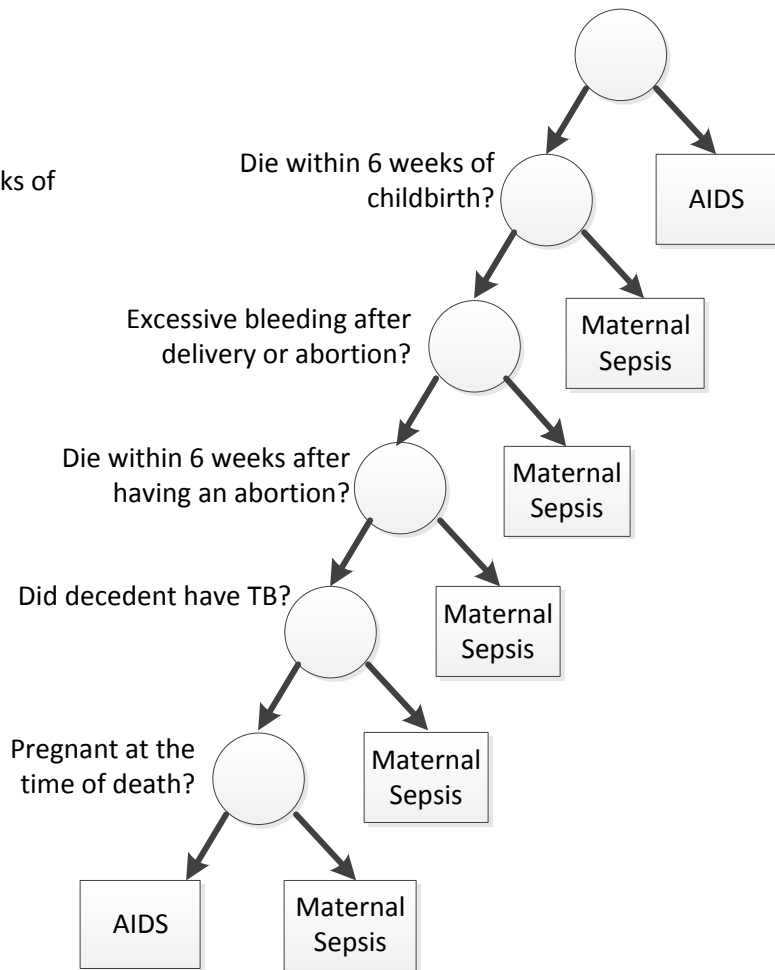

Supplement: MOESM7 [file 9572764]
